# Supplementary material
Source: Springer Nature journal article supplement (https://www.springermedizin.de/resource/supplementary/13054_2010_8405_MOESM1_ESM.pdf/9731890)

**a**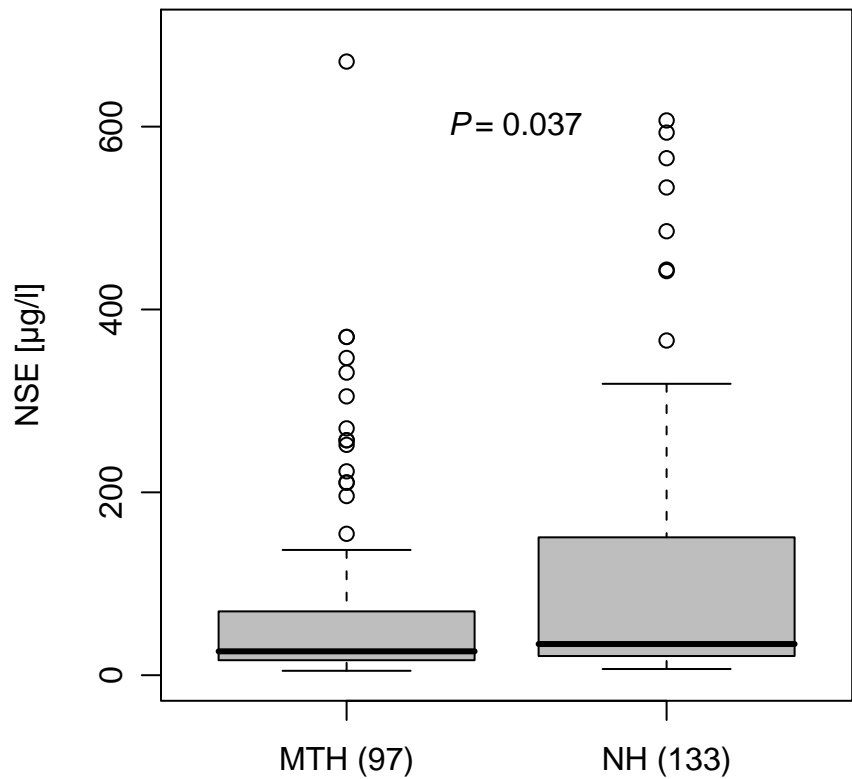**b**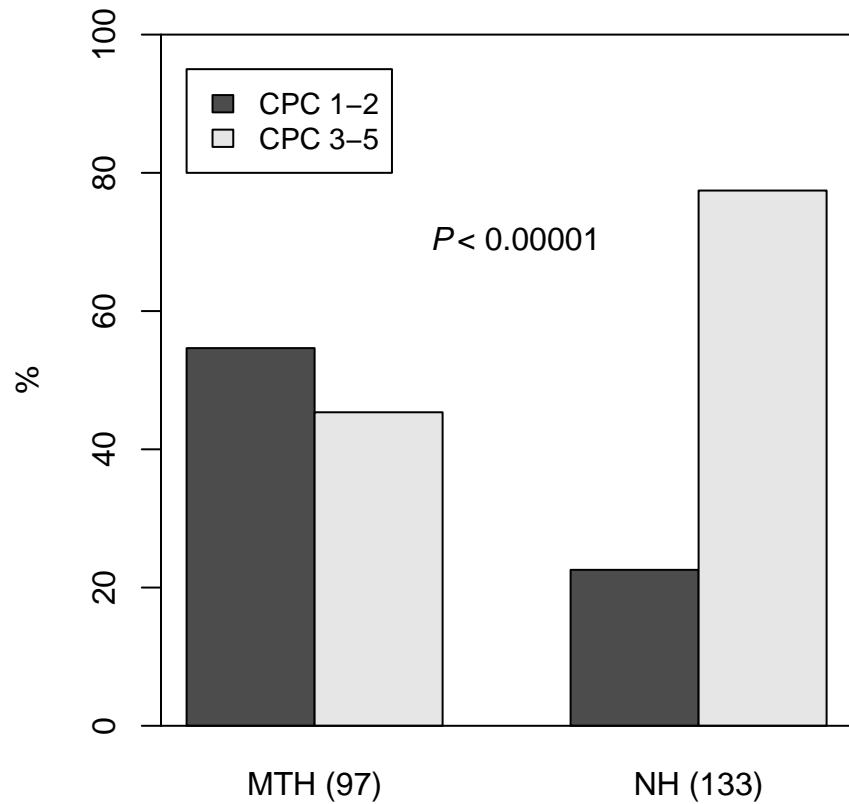

Supplement: MOESM1 [file 9731890]
